# Supplementary material for: Broadband white luminescent phosphor Ba(Si7−xAlx)Liy(N10−x+yOx−y):Eu2+ with a high color rendering index for solid state lighting
Source: Royal Society of Chemistry journal article supplement (doi:10.1039/d0tc04228e), 2021-01-01
Supplement: d0tc04228e1.pdf [file d0tc04228e1.pdf]

**Table S1 Crystallographic data of Ba<sub>0.81</sub>Eu<sub>0.19</sub>(Si<sub>6.66</sub>Al<sub>0.34</sub>)(N<sub>9.66</sub>O<sub>0.34</sub>)<sub>10</sub> synthesized with addition of Li<sub>3</sub>N.**

|                                                              |                                                          |
|--------------------------------------------------------------|----------------------------------------------------------|
| Formula mass / g·mol <sup>-1</sup>                           | 477.19                                                   |
| Crystal system                                               | Monoclinic                                               |
| Space group                                                  | <i>Pc</i> (No.7)                                         |
| Cell parameters / Å, °                                       | a=6.8915(2), b=6.7059(2), c=9.6825(2),<br>β =106.2221(4) |
| V / Å <sup>3</sup>                                           | 429.65 (2)                                               |
| Density /g·cm <sup>-3</sup>                                  | 3.688                                                    |
| Z                                                            | 2                                                        |
| Crystal size / mm <sup>3</sup>                               | 0.12 x 0.05 x 0.02                                       |
| Temperature / K                                              | 295                                                      |
| Diffractometer                                               | Bruker APEXII CCD area detector                          |
| Radiation type                                               | Mo Kα (λ = 0.71073 Å)                                    |
| Scan mode                                                    | ω scan                                                   |
| Abs correction                                               | Multiscan (SADABS)                                       |
| μ / mm <sup>-1</sup>                                         | 6.09                                                     |
| θ <sub>max</sub> / deg                                       | 35.6                                                     |
| Measured reflections                                         | 8699                                                     |
| Independent reflections                                      | 3810                                                     |
| Observed reflections                                         | 3768                                                     |
| T <sub>min</sub> , T <sub>max</sub>                          | 0.536, 0.779                                             |
| R[F <sup>2</sup> > 2σ(F <sup>2</sup> )], wR(F <sup>2</sup> ) | 0.017, 0.044                                             |
| ρ <sub>max</sub> , ρ <sub>min</sub> / e Å <sup>-3</sup>      | 0.57, -1.53                                              |
| S                                                            | 1.10                                                     |

**Table S2 Atomic coordinates, occupancies, and isotropic atomic displacement parameters of Ba<sub>0.81</sub>Eu<sub>0.19</sub>(Si<sub>6.66</sub>Al<sub>0.34</sub>)(N<sub>9.66</sub>O<sub>0.34</sub>)<sub>10</sub> synthesized with addition of Li<sub>3</sub>N.**

| Atom | x            | y           | Z           | Ueq / Å <sup>2</sup> | Occupancy |
|------|--------------|-------------|-------------|----------------------|-----------|
| Ba1  | -0.01965(10) | 1.09982(11) | 0.83844(7)  | 0.01840(10)          | 0.592(4)  |
| Eu1  | -0.01965(10) | 1.09982(11) | 0.83844(7)  | 0.01840(10)          | 0.139(4)  |
| Ba2  | 0.0043(7)    | 1.1264(8)   | 0.8747(6)   | 0.0313(8)            | 0.114(4)  |
| Eu2  | 0.0043(7)    | 1.1264(8)   | 0.8747(6)   | 0.0313(8)            | 0.027(4)  |
| Ba3  | -0.0332(7)   | 1.0929(7)   | 0.8060(5)   | 0.0299(13)           | 0.104(4)  |
| Eu3  | -0.0332(7)   | 1.0929(7)   | 0.8060(5)   | 0.0299(13)           | 0.024(4)  |
| Si1  | 0.37941(8)   | 0.97375(9)  | 0.68305(6)  | 0.00402(10)          | 0.951     |
| Si2  | -0.44106(8)  | 0.97396(9)  | 0.99436(6)  | 0.00394(10)          | 0.951     |
| Si3  | 0.13025(9)   | 0.60482(8)  | 0.74035(7)  | 0.00413(10)          | 0.951     |
| Si4  | -0.12893(9)  | 0.62467(9)  | 0.97397(7)  | 0.00384(10)          | 0.951     |
| Si5  | 0.31693(9)   | 0.61818(8)  | 1.05100(7)  | 0.00315(10)          | 0.951     |
| Si6  | -0.31261(9)  | 0.36645(9)  | 1.15945(7)  | 0.00312(9)           | 0.951     |
| Si7  | 0.50478(9)   | 0.37173(8)  | 0.85482(7)  | 0.00317(9)           | 0.951     |
| Al1  | 0.37941(8)   | 0.97375(9)  | 0.68305(6)  | 0.00402(10)          | 0.049     |
| Al2  | -0.44106(8)  | 0.97396(9)  | 0.99436(6)  | 0.00394(10)          | 0.049     |
| Al3  | 0.13025(9)   | 0.60482(8)  | 0.74035(7)  | 0.00413(10)          | 0.049     |
| Al4  | -0.12893(9)  | 0.62467(9)  | 0.97397(7)  | 0.00384(10)          | 0.049     |
| Al5  | 0.31693(9)   | 0.61818(8)  | 1.05100(7)  | 0.00315(10)          | 0.049     |
| Al6  | -0.31261(9)  | 0.36645(9)  | 1.15945(7)  | 0.00312(9)           | 0.049     |
| Al7  | 0.50478(9)   | 0.37173(8)  | 0.85482(7)  | 0.00317(9)           | 0.049     |
| N1   | -0.2345(3)   | 0.8421(3)   | 0.9976(2)   | 0.0092(3)            | 0.966     |
| N2   | 0.5889(3)    | 0.8673(3)   | 0.64241(19) | 0.0055(3)            | 0.966     |
| N3   | -0.6581(3)   | 0.8697(3)   | 1.03157(19) | 0.0052(3)            | 0.966     |
| N4   | 0.4667(4)    | 1.1168(2)   | 0.8388(2)   | 0.0065(3)            | 0.966     |
| N5   | 0.1819(3)    | 0.8338(3)   | 0.6845(2)   | 0.0081(3)            | 0.966     |
| N6   | -0.2746(3)   | 0.4151(2)   | 0.99134(18) | 0.0050(3)            | 0.966     |
| N7   | 0.1002(3)    | 0.5803(3)   | 1.10447(19) | 0.0060(3)            | 0.966     |
| N8   | -0.0920(3)   | 0.3867(3)   | 1.29849(19) | 0.0062(3)            | 0.966     |
| N9   | 0.3068(2)    | 0.4985(3)   | 0.89264(17) | 0.0058(2)            | 0.966     |
| N10  | -0.4812(2)   | 0.5370(3)   | 1.19138(17) | 0.0048(2)            | 0.966     |
| O1   | -0.2345(3)   | 0.8421(3)   | 0.9976(2)   | 0.0092(3)            | 0.034     |
| O2   | 0.5889(3)    | 0.8673(3)   | 0.64241(19) | 0.0055(3)            | 0.034     |
| O3   | -0.6581(3)   | 0.8697(3)   | 1.03157(19) | 0.0052(3)            | 0.034     |
| O4   | 0.4667(4)    | 1.1168(2)   | 0.8388(2)   | 0.0065(3)            | 0.034     |
| O5   | 0.1819(3)    | 0.8338(3)   | 0.6845(2)   | 0.0081(3)            | 0.034     |
| O6   | -0.2746(3)   | 0.4151(2)   | 0.99134(18) | 0.0050(3)            | 0.034     |
| O7   | 0.1002(3)    | 0.5803(3)   | 1.10447(19) | 0.0060(3)            | 0.034     |
| O8   | -0.0920(3)   | 0.3867(3)   | 1.29849(19) | 0.0062(3)            | 0.034     |
| O9   | 0.3068(2)    | 0.4985(3)   | 0.89264(17) | 0.0058(2)            | 0.034     |
| O10  | -0.4812(2)   | 0.5370(3)   | 1.19138(17) | 0.0048(2)            | 0.034     |

**Table S3 Anisotropic atomic displacement parameters ( $\text{\AA}^2$ ) of  $\text{Ba}_{0.81}\text{Eu}_{0.19}(\text{Si}_{6.66}\text{Al}_{0.34})(\text{N}_{9.66}\text{O}_{0.34})_{10}$  synthesized with addition of  $\text{Li}_3\text{N}$ .**

| Atom | $U^{11}$   | $U^{22}$    | $U^{33}$    | $U^{12}$     | $U^{13}$    | $U^{23}$     |
|------|------------|-------------|-------------|--------------|-------------|--------------|
| Ba1  | 0.0180(2)  | 0.0127(2)   | 0.0274(4)   | 0.0028(2)    | 0.0112(3)   | 0.00343(15)  |
| Eu1  | 0.0180(2)  | 0.0127(2)   | 0.0274(4)   | 0.0028(2)    | 0.0112(3)   | 0.00343(15)  |
| Ba2  | 0.0228(12) | 0.0206(14)  | 0.052(2)    | 0.0070(12)   | 0.0122(14)  | 0.0064(9)    |
| Eu2  | 0.0228(12) | 0.0206(14)  | 0.052(2)    | 0.0070(12)   | 0.0122(14)  | 0.0064(9)    |
| Si1  | 0.0051(2)  | 0.0031(2)   | 0.0042(2)   | 0.00002(15)  | 0.00185(17) | 0.00017(16)  |
| Si2  | 0.0054(2)  | 0.0027(2)   | 0.0041(2)   | 0.00016(15)  | 0.00209(17) | 0.00021(16)  |
| Si3  | 0.0037(2)  | 0.0039(2)   | 0.0048(2)   | -0.00068(15) | 0.00129(17) | -0.00010(15) |
| Si4  | 0.0034(2)  | 0.0041(2)   | 0.0041(2)   | 0.00062(16)  | 0.00119(17) | -0.00002(16) |
| Si5  | 0.0033(2)  | 0.0030(2)   | 0.0032(2)   | -0.00009(15) | 0.00098(16) | -0.00007(15) |
| Si6  | 0.0032(2)  | 0.0030(2)   | 0.00323(19) | -0.00011(16) | 0.00088(15) | -0.00027(16) |
| Si7  | 0.0033(2)  | 0.00272(18) | 0.0035(2)   | -0.00013(15) | 0.00103(15) | -0.00015(15) |
| Al1  | 0.0051(2)  | 0.0031(2)   | 0.0042(2)   | 0.00002(15)  | 0.00185(17) | 0.00017(16)  |
| Al2  | 0.0054(2)  | 0.0027(2)   | 0.0041(2)   | 0.00016(15)  | 0.00209(17) | 0.00021(16)  |
| Al3  | 0.0037(2)  | 0.0039(2)   | 0.0048(2)   | -0.00068(15) | 0.00129(17) | -0.00010(15) |
| Al4  | 0.0034(2)  | 0.0041(2)   | 0.0041(2)   | 0.00062(16)  | 0.00119(17) | -0.00002(16) |
| Al5  | 0.0033(2)  | 0.0030(2)   | 0.0032(2)   | -0.00009(15) | 0.00098(16) | -0.00007(15) |
| Al6  | 0.0032(2)  | 0.0030(2)   | 0.00323(19) | -0.00011(16) | 0.00088(15) | -0.00027(16) |
| Al7  | 0.0033(2)  | 0.00272(18) | 0.0035(2)   | -0.00013(15) | 0.00103(15) | -0.00015(15) |
| N1   | 0.0092(7)  | 0.0059(8)   | 0.0138(8)   | -0.0005(6)   | 0.0053(6)   | 0.0011(6)    |
| N2   | 0.0084(7)  | 0.0037(6)   | 0.0052(6)   | 0.0011(5)    | 0.0033(5)   | 0.0020(5)    |
| N3   | 0.0070(7)  | 0.0038(6)   | 0.0052(6)   | 0.0001(5)    | 0.0022(5)   | -0.0005(5)   |
| N4   | 0.0116(8)  | 0.0032(5)   | 0.0041(5)   | -0.0001(5)   | 0.0011(5)   | -0.0012(6)   |
| N5   | 0.0085(7)  | 0.0049(8)   | 0.0113(7)   | 0.0007(6)    | 0.0034(6)   | 0.0000(6)    |
| N6   | 0.0043(6)  | 0.0059(6)   | 0.0046(6)   | 0.0008(5)    | 0.0008(4)   | -0.0016(5)   |
| N7   | 0.0036(6)  | 0.0072(7)   | 0.0074(6)   | 0.0015(5)    | 0.0014(5)   | 0.0005(5)    |
| N8   | 0.0037(6)  | 0.0091(7)   | 0.0055(6)   | -0.0001(5)   | 0.0004(5)   | -0.0006(5)   |
| N9   | 0.0056(6)  | 0.0064(6)   | 0.0050(6)   | -0.0014(5)   | 0.0012(4)   | 0.0014(5)    |
| N10  | 0.0051(6)  | 0.0049(6)   | 0.0039(6)   | -0.0001(4)   | 0.0006(4)   | 0.0019(5)    |
| O1   | 0.0092(7)  | 0.0059(8)   | 0.0138(8)   | -0.0005(6)   | 0.0053(6)   | 0.0011(6)    |
| O2   | 0.0084(7)  | 0.0037(6)   | 0.0052(6)   | 0.0011(5)    | 0.0033(5)   | 0.0020(5)    |
| O3   | 0.0070(7)  | 0.0038(6)   | 0.0052(6)   | 0.0001(5)    | 0.0022(5)   | -0.0005(5)   |
| O4   | 0.0116(8)  | 0.0032(5)   | 0.0041(5)   | -0.0001(5)   | 0.0011(5)   | -0.0012(6)   |
| O5   | 0.0085(7)  | 0.0049(8)   | 0.0113(7)   | 0.0007(6)    | 0.0034(6)   | 0.0000(6)    |
| O6   | 0.0043(6)  | 0.0059(6)   | 0.0046(6)   | 0.0008(5)    | 0.0008(4)   | -0.0016(5)   |
| O7   | 0.0036(6)  | 0.0072(7)   | 0.0074(6)   | 0.0015(5)    | 0.0014(5)   | 0.0005(5)    |
| O8   | 0.0037(6)  | 0.0091(7)   | 0.0055(6)   | -0.0001(5)   | 0.0004(5)   | -0.0006(5)   |
| O9   | 0.0056(6)  | 0.0064(6)   | 0.0050(6)   | -0.0014(5)   | 0.0012(4)   | 0.0014(5)    |
| O10  | 0.0051(6)  | 0.0049(6)   | 0.0039(6)   | -0.0001(4)   | 0.0006(4)   | 0.0019(5)    |

**Table S4 Crystallographic data of Ba<sub>0.81</sub>Eu<sub>0.19</sub>(Si<sub>6.66</sub>Al<sub>0.34</sub>)(N<sub>9.66</sub>O<sub>0.34</sub>)<sub>10</sub> synthesized without Li<sub>3</sub>N.**

---

|                                                              |                                                           |
|--------------------------------------------------------------|-----------------------------------------------------------|
| Formula mass / g·mol <sup>-1</sup>                           | 477.19                                                    |
| Crystal system                                               | Monoclinic                                                |
| Space group                                                  | <i>Pc</i> (No.7)                                          |
| Cell parameters / Å, °                                       | a=6.8838(5), b=6.7141(5), c=9.6707(7),<br>β =106.2669(14) |
| V / Å <sup>3</sup>                                           | 429.07(5)                                                 |
| Density /g·cm <sup>-3</sup>                                  | 3.693                                                     |
| Z                                                            | 2                                                         |
| Crystal size / mm <sup>3</sup>                               | 0.019 x 0.009 x 0.007                                     |
| Temperature / K                                              | 295                                                       |
| Diffractometer                                               | Bruker APEXII CCD area detector                           |
| Radiation type                                               | Mo Kα (λ = 0.71073 Å)                                     |
| Scan mode                                                    | ω scan                                                    |
| Abs correction                                               | Multiscan (SADABS)                                        |
| μ / mm <sup>-1</sup>                                         | 6.10                                                      |
| θ <sub>max</sub> / deg                                       | 28.3                                                      |
| Measured reflections                                         | 6350                                                      |
| Independent reflections                                      | 2112                                                      |
| Observed reflections                                         | 1945                                                      |
| T <sub>min</sub> , T <sub>max</sub>                          | 0.946, 0.972                                              |
| R[F <sup>2</sup> > 2σ(F <sup>2</sup> )], wR(F <sup>2</sup> ) | 0.033, 0.084                                              |
| ρ <sub>max</sub> , ρ <sub>min</sub> / e Å <sup>-3</sup>      | 1.53, -0.78                                               |
| S                                                            | 1.12                                                      |

---

**Table S5 Atomic coordinates, occupancies, and isotropic atomic displacement parameters of  $\text{Ba}_{0.81}\text{Eu}_{0.19}(\text{Si}_{6.66}\text{Al}_{0.34})(\text{N}_{9.66}\text{O}_{0.34})_{10}$  synthesized without  $\text{Li}_3\text{N}$ .**

| Atom | x            | y          | Z           | Ueq / Å <sup>2</sup> | Occupancy |
|------|--------------|------------|-------------|----------------------|-----------|
| Ba1  | -0.02025(18) | 1.09863(8) | 0.83980(14) | 0.02567(19)          | 0.81      |
| Eu1  | -0.02025(18) | 1.09863(8) | 0.83980(14) | 0.02567(19)          | 0.19      |
| Si1  | 0.3814(4)    | 0.9736(6)  | 0.6834(3)   | 0.0043(7)            | 0.951     |
| Si2  | -0.4378(4)   | 0.9744(7)  | 0.9951(3)   | 0.0055(7)            | 0.951     |
| Si3  | 0.1303(6)    | 0.6068(5)  | 0.7386(4)   | 0.0115(8)            | 0.951     |
| Si4  | -0.1295(6)   | 0.6219(5)  | 0.9722(4)   | 0.0107(8)            | 0.951     |
| Si5  | 0.3150(6)    | 0.6193(5)  | 1.0488(4)   | 0.0121(8)            | 0.951     |
| Si6  | -0.3149(7)   | 0.3670(6)  | 1.1566(4)   | 0.0114(7)            | 0.951     |
| Si7  | 0.5026(8)    | 0.3721(3)  | 0.8529(5)   | 0.0113(7)            | 0.951     |
| Al1  | 0.3814(4)    | 0.9736(6)  | 0.6834(3)   | 0.0043(7)            | 0.049     |
| Al2  | -0.4378(4)   | 0.9744(7)  | 0.9951(3)   | 0.0055(7)            | 0.049     |
| Al3  | 0.1303(6)    | 0.6068(5)  | 0.7386(4)   | 0.0115(8)            | 0.049     |
| Al4  | -0.1295(6)   | 0.6219(5)  | 0.9722(4)   | 0.0107(8)            | 0.049     |
| Al5  | 0.3150(6)    | 0.6193(5)  | 1.0488(4)   | 0.0121(8)            | 0.049     |
| Al6  | -0.3149(7)   | 0.3670(6)  | 1.1566(4)   | 0.0114(7)            | 0.049     |
| Al7  | 0.5026(8)    | 0.3721(3)  | 0.8529(5)   | 0.0113(7)            | 0.049     |
| N1   | -0.2284(18)  | 0.8357(19) | 0.9969(13)  | 0.011(2)             | 0.966     |
| N2   | 0.5935(15)   | 0.8698(16) | 0.6459(10)  | 0.0021(18)           | 0.966     |
| N3   | -0.6560(16)  | 0.8681(17) | 1.0341(12)  | 0.010(2)             | 0.966     |
| N4   | 0.472(2)     | 1.1171(9)  | 0.8396(15)  | 0.0073(12)           | 0.966     |
| N5   | 0.1864(18)   | 0.8387(19) | 0.6838(12)  | 0.010(2)             | 0.966     |
| N6   | -0.2711(13)  | 0.4139(12) | 0.9913(9)   | 0.0112(16)           | 0.966     |
| N7   | 0.1054(12)   | 0.5807(12) | 1.1045(9)   | 0.0099(15)           | 0.966     |
| N8   | -0.0873(13)  | 0.3873(12) | 1.2989(9)   | 0.0132(16)           | 0.966     |
| N9   | 0.3114(11)   | 0.4987(13) | 0.8918(9)   | 0.0092(15)           | 0.966     |
| N10  | -0.4772(12)  | 0.5361(12) | 1.1913(9)   | 0.0095(15)           | 0.966     |
| O1   | -0.2284(18)  | 0.8357(19) | 0.9969(13)  | 0.011(2)             | 0.034     |
| O2   | 0.5935(15)   | 0.8698(16) | 0.6459(10)  | 0.0021(18)           | 0.034     |
| O3   | -0.6560(16)  | 0.8681(17) | 1.0341(12)  | 0.010(2)             | 0.034     |
| O4   | 0.472(2)     | 1.1171(9)  | 0.8396(15)  | 0.0073(12)           | 0.034     |
| O5   | 0.1864(18)   | 0.8387(19) | 0.6838(12)  | 0.010(2)             | 0.034     |
| O6   | -0.2711(13)  | 0.4139(12) | 0.9913(9)   | 0.0112(16)           | 0.034     |
| O7   | 0.1054(12)   | 0.5807(12) | 1.1045(9)   | 0.0099(15)           | 0.034     |
| O8   | -0.0873(13)  | 0.3873(12) | 1.2989(9)   | 0.0132(16)           | 0.034     |
| O9   | 0.3114(11)   | 0.4987(13) | 0.8918(9)   | 0.0092(15)           | 0.034     |
| O10  | -0.4772(12)  | 0.5361(12) | 1.1913(9)   | 0.0095(15)           | 0.034     |

**Table S6 Anisotropic atomic displacement parameters ( $\text{\AA}^2$ ) of  $\text{Ba}_{0.81}\text{Eu}_{0.19}(\text{Si}_{6.66}\text{Al}_{0.34})(\text{N}_{9.66}\text{O}_{0.34})_{10}$  synthesized without  $\text{Li}_3\text{N}$ .**

| Atom | $U^{11}$   | $U^{22}$   | $U^{33}$   | $U^{12}$    | $U^{13}$   | $U^{23}$    |
|------|------------|------------|------------|-------------|------------|-------------|
| Ba1  | 0.0259(3)  | 0.0201(3)  | 0.0355(4)  | 0.0037(5)   | 0.0161(2)  | 0.0032(4)   |
| Eu1  | 0.0259(3)  | 0.0201(3)  | 0.0355(4)  | 0.0037(5)   | 0.0161(2)  | 0.0032(4)   |
| Si1  | 0.0043(15) | 0.0034(18) | 0.0049(17) | 0.0002(10)  | 0.0006(13) | -0.0012(10) |
| Si2  | 0.0066(15) | 0.006(2)   | 0.0042(17) | 0.0004(10)  | 0.0025(13) | -0.0018(10) |
| Si3  | 0.0163(16) | 0.0084(16) | 0.0140(16) | -0.0062(11) | 0.0110(13) | -0.0070(12) |
| Si4  | 0.0162(17) | 0.0075(15) | 0.0129(17) | 0.0047(12)  | 0.0115(13) | 0.0041(12)  |
| Si5  | 0.0230(19) | 0.0060(16) | 0.0127(17) | -0.0040(12) | 0.0137(14) | -0.0059(12) |
| Si6  | 0.0212(18) | 0.0081(14) | 0.0095(15) | -0.0031(11) | 0.0119(13) | -0.0051(12) |
| Si7  | 0.023(2)   | 0.0045(9)  | 0.0102(16) | 0.0000(12)  | 0.0110(14) | 0.0004(13)  |
| Al1  | 0.0043(15) | 0.0034(18) | 0.0049(17) | 0.0002(10)  | 0.0006(13) | -0.0012(10) |
| Al2  | 0.0066(15) | 0.006(2)   | 0.0042(17) | 0.0004(10)  | 0.0025(13) | -0.0018(10) |
| Al3  | 0.0163(16) | 0.0084(16) | 0.0140(16) | -0.0062(11) | 0.0110(13) | -0.0070(12) |
| Al4  | 0.0162(17) | 0.0075(15) | 0.0129(17) | 0.0047(12)  | 0.0115(13) | 0.0041(12)  |
| Al5  | 0.0230(19) | 0.0060(16) | 0.0127(17) | -0.0040(12) | 0.0137(14) | -0.0059(12) |
| Al6  | 0.0212(18) | 0.0081(14) | 0.0095(15) | -0.0031(11) | 0.0119(13) | -0.0051(12) |
| Al7  | 0.023(2)   | 0.0045(9)  | 0.0102(16) | 0.0000(12)  | 0.0110(14) | 0.0004(13)  |
| N3   | 0.010(4)   | 0.012(4)   | 0.011(4)   | 0.001(3)    | 0.007(3)   | -0.001(3)   |
| N5   | 0.013(4)   | 0.006(4)   | 0.010(4)   | -0.006(3)   | 0.005(3)   | -0.005(3)   |
| N6   | 0.013(4)   | 0.012(4)   | 0.007(4)   | 0.001(3)    | 0.001(3)   | -0.003(3)   |
| N7   | 0.009(4)   | 0.011(4)   | 0.010(4)   | -0.001(3)   | 0.003(3)   | 0.000(3)    |
| N8   | 0.012(4)   | 0.017(4)   | 0.010(4)   | -0.006(3)   | 0.003(3)   | -0.005(3)   |
| N9   | 0.003(3)   | 0.013(4)   | 0.010(4)   | 0.003(3)    | 0.001(3)   | 0.000(3)    |
| N10  | 0.010(4)   | 0.007(3)   | 0.012(4)   | -0.001(3)   | 0.003(3)   | -0.004(3)   |
| O3   | 0.010(4)   | 0.012(4)   | 0.011(4)   | 0.001(3)    | 0.007(3)   | -0.001(3)   |
| O5   | 0.013(4)   | 0.006(4)   | 0.010(4)   | -0.006(3)   | 0.005(3)   | -0.005(3)   |
| O6   | 0.013(4)   | 0.012(4)   | 0.007(4)   | 0.001(3)    | 0.001(3)   | -0.003(3)   |
| O7   | 0.009(4)   | 0.011(4)   | 0.010(4)   | -0.001(3)   | 0.003(3)   | 0.000(3)    |
| O8   | 0.012(4)   | 0.017(4)   | 0.010(4)   | -0.006(3)   | 0.003(3)   | -0.005(3)   |
| O9   | 0.003(3)   | 0.013(4)   | 0.010(4)   | 0.003(3)    | 0.001(3)   | 0.000(3)    |
| O10  | 0.010(4)   | 0.007(3)   | 0.012(4)   | -0.001(3)   | 0.003(3)   | -0.004(3)   |

**Table S7 Crystallographic data of refined  $\text{Ba}_{0.81}\text{Eu}_{0.19}(\text{Si}_{6.66}\text{Al}_{0.34})(\text{N}_{9.66}\text{O}_{0.34})_{10}$  synthesized with addition of  $\text{Li}_3\text{N}$ .**

---

|                                                              |                                                         |
|--------------------------------------------------------------|---------------------------------------------------------|
| Formula mass / g·mol <sup>-1</sup>                           | 477.19                                                  |
| Crystal system                                               | Monoclinic                                              |
| Space group                                                  | <i>Pc</i> (No.7)                                        |
| Cell parameters / Å, °                                       | a=6.8951(2), b=6.7070(2), c=9.6773(2),<br>β=106.2416(3) |
| V / Å <sup>3</sup>                                           | 429.67 (2)                                              |
| Density /g·cm <sup>-3</sup>                                  | 3.689                                                   |
| Z                                                            | 2                                                       |
| Crystal size / mm <sup>3</sup>                               | 0.16 x 0.08 x 0.02                                      |
| Temperature / K                                              | 295                                                     |
| Diffractometer                                               | Bruker APEXII CCD area detector                         |
| Radiation type                                               | Mo Kα (λ = 0.71073 Å)                                   |
| Scan mode                                                    | ω scan                                                  |
| Abs correction                                               | Multiscan (SADABS)                                      |
| μ / mm <sup>-1</sup>                                         | 6.09                                                    |
| θ <sub>max</sub> / deg                                       | 35.6                                                    |
| Measured reflections                                         | 10060                                                   |
| Independent reflections                                      | 3925                                                    |
| Observed reflections                                         | 3896                                                    |
| T <sub>min</sub> , T <sub>max</sub>                          | 0.511, 0.753                                            |
| R[F <sup>2</sup> > 2σ(F <sup>2</sup> )], wR(F <sup>2</sup> ) | 0.025, 0.070                                            |
| ρ <sub>max</sub> , ρ <sub>min</sub> / e Å <sup>-3</sup>      | 1.54, -1.57                                             |
| S                                                            | 1.06                                                    |

---

**Table S8 Atomic coordinates, occupancies, and isotropic atomic displacement parameters of refined  $\text{Ba}_{0.81}\text{Eu}_{0.19}(\text{Si}_{6.66}\text{Al}_{0.34})(\text{N}_{9.66}\text{O}_{0.34})_{10}$  synthesized with addition of  $\text{Li}_3\text{N}$ .**

| Atom | x            | y           | Z           | Ueq / Å <sup>2</sup> | Occupancy |
|------|--------------|-------------|-------------|----------------------|-----------|
| Ba1  | -0.01992(6)  | 1.10034(3)  | 0.83853(5)  | 0.02343(7)           | 0.81      |
| Eu1  | -0.01992(6)  | 1.10034(3)  | 0.83853(5)  | 0.02343(7)           | 0.19      |
| Si1  | 0.37978(12)  | 0.97418(14) | 0.68285(8)  | 0.00344(14)          | 0.951     |
| Si2  | -0.44005(12) | 0.97425(14) | 0.99450(8)  | 0.00325(15)          | 0.951     |
| Si3  | 0.13036(15)  | 0.60498(13) | 0.73994(11) | 0.00493(15)          | 0.951     |
| Si4  | -0.12872(13) | 0.62427(14) | 0.97377(10) | 0.00456(15)          | 0.951     |
| Si5  | 0.31718(14)  | 0.61795(13) | 1.05051(10) | 0.00397(15)          | 0.951     |
| Si6  | -0.31247(14) | 0.36629(15) | 1.15913(10) | 0.00391(13)          | 0.951     |
| Si7  | 0.50492(14)  | 0.37203(12) | 0.85450(10) | 0.00387(13)          | 0.951     |
| Al1  | 0.37978(12)  | 0.97418(14) | 0.68285(8)  | 0.00344(14)          | 0.049     |
| Al2  | -0.44005(12) | 0.97425(14) | 0.99450(8)  | 0.00325(15)          | 0.049     |
| Al3  | 0.13036(15)  | 0.60498(13) | 0.73994(11) | 0.00493(15)          | 0.049     |
| Al4  | -0.12872(13) | 0.62427(14) | 0.97377(10) | 0.00456(15)          | 0.049     |
| Al5  | 0.31718(14)  | 0.61795(13) | 1.05051(10) | 0.00397(15)          | 0.049     |
| Al6  | -0.31247(14) | 0.36629(15) | 1.15913(10) | 0.00391(13)          | 0.049     |
| Al7  | 0.50492(14)  | 0.37203(12) | 0.85450(10) | 0.00387(13)          | 0.049     |
| N1   | -0.2332(5)   | 0.8418(5)   | 0.9979(4)   | 0.0087(5)            | 0.966     |
| N2   | 0.5888(4)    | 0.8673(5)   | 0.6425(3)   | 0.0052(4)            | 0.966     |
| N3   | -0.6574(4)   | 0.8690(5)   | 1.0319(3)   | 0.0049(4)            | 0.966     |
| N4   | 0.4683(6)    | 1.1171(3)   | 0.8386(4)   | 0.0062(4)            | 0.966     |
| N5   | 0.1820(5)    | 0.8342(5)   | 0.6843(3)   | 0.0081(5)            | 0.966     |
| N6   | -0.2740(4)   | 0.4150(4)   | 0.9909(3)   | 0.0052(4)            | 0.966     |
| N7   | 0.1015(4)    | 0.5800(4)   | 1.1037(3)   | 0.0064(4)            | 0.966     |
| N8   | -0.0919(4)   | 0.3866(4)   | 1.2984(3)   | 0.0067(4)            | 0.966     |
| N9   | 0.3074(4)    | 0.4988(4)   | 0.8923(3)   | 0.0064(4)            | 0.966     |
| N10  | -0.4805(4)   | 0.5370(4)   | 1.1912(3)   | 0.0054(4)            | 0.966     |
| O1   | -0.2332(5)   | 0.8418(5)   | 0.9979(4)   | 0.0087(5)            | 0.034     |
| O2   | 0.5888(4)    | 0.8673(5)   | 0.6425(3)   | 0.0052(4)            | 0.034     |
| O3   | -0.6574(4)   | 0.8690(5)   | 1.0319(3)   | 0.0049(4)            | 0.034     |
| O4   | 0.4683(6)    | 1.1171(3)   | 0.8386(4)   | 0.0062(4)            | 0.034     |
| O5   | 0.1820(5)    | 0.8342(5)   | 0.6843(3)   | 0.0081(5)            | 0.034     |
| O6   | -0.2740(4)   | 0.4150(4)   | 0.9909(3)   | 0.0052(4)            | 0.034     |
| O7   | 0.1015(4)    | 0.5800(4)   | 1.1037(3)   | 0.0064(4)            | 0.034     |
| O8   | -0.0919(4)   | 0.3866(4)   | 1.2984(3)   | 0.0067(4)            | 0.034     |
| O9   | 0.3074(4)    | 0.4988(4)   | 0.8923(3)   | 0.0064(4)            | 0.034     |
| O10  | -0.4805(4)   | 0.5370(4)   | 1.1912(3)   | 0.0054(4)            | 0.034     |



**Table S9 Anisotropic atomic displacement parameters ( $\text{\AA}^2$ ) of refired  $\text{Ba}_{0.81}\text{Eu}_{0.19}(\text{Si}_{6.66}\text{Al}_{0.34})(\text{N}_{9.66}\text{O}_{0.34})_{10}$  synthesized with addition of  $\text{Li}_3\text{N}$ .**

| Atom | $U^{11}$    | $U^{22}$    | $U^{33}$    | $U^{12}$    | $U^{13}$   | $U^{23}$   |
|------|-------------|-------------|-------------|-------------|------------|------------|
| Ba1  | 0.02277(11) | 0.01677(10) | 0.03482(14) | 0.00514(10) | 0.01478(9) | 0.00458(9) |
| Eu1  | 0.02277(11) | 0.01677(10) | 0.03482(14) | 0.00514(10) | 0.01478(9) | 0.00458(9) |
| Si1  | 0.0045(3)   | 0.0030(3)   | 0.0028(3)   | 0.0002(2)   | 0.0009(3)  | 0.0000(2)  |
| Si2  | 0.0044(3)   | 0.0024(4)   | 0.0030(3)   | 0.0002(2)   | 0.0012(2)  | 0.0000(2)  |
| Si3  | 0.0055(3)   | 0.0049(4)   | 0.0048(3)   | -0.0012(2)  | 0.0022(3)  | -0.0010(2) |
| Si4  | 0.0055(3)   | 0.0042(3)   | 0.0045(3)   | 0.0008(3)   | 0.0023(3)  | 0.0005(3)  |
| Si5  | 0.0059(3)   | 0.0032(3)   | 0.0032(3)   | -0.0009(2)  | 0.0019(3)  | -0.0009(2) |
| Si6  | 0.0050(3)   | 0.0035(3)   | 0.0036(3)   | -0.0004(3)  | 0.0019(2)  | -0.0009(3) |
| Si7  | 0.0057(3)   | 0.0029(3)   | 0.0033(3)   | 0.0002(2)   | 0.0019(2)  | 0.0001(2)  |
| Al1  | 0.0045(3)   | 0.0030(3)   | 0.0028(3)   | 0.0002(2)   | 0.0009(3)  | 0.0000(2)  |
| Al2  | 0.0044(3)   | 0.0024(4)   | 0.0030(3)   | 0.0002(2)   | 0.0012(2)  | 0.0000(2)  |
| Al3  | 0.0055(3)   | 0.0049(4)   | 0.0048(3)   | -0.0012(2)  | 0.0022(3)  | -0.0010(2) |
| Al4  | 0.0055(3)   | 0.0042(3)   | 0.0045(3)   | 0.0008(3)   | 0.0023(3)  | 0.0005(3)  |
| Al5  | 0.0059(3)   | 0.0032(3)   | 0.0032(3)   | -0.0009(2)  | 0.0019(3)  | -0.0009(2) |
| Al6  | 0.0050(3)   | 0.0035(3)   | 0.0036(3)   | -0.0004(3)  | 0.0019(2)  | -0.0009(3) |
| Al7  | 0.0057(3)   | 0.0029(3)   | 0.0033(3)   | 0.0002(2)   | 0.0019(2)  | 0.0001(2)  |
| N1   | 0.0099(11)  | 0.0055(12)  | 0.0129(11)  | -0.0005(9)  | 0.0068(9)  | 0.0024(9)  |
| N2   | 0.0068(10)  | 0.0042(9)   | 0.0053(9)   | 0.0015(8)   | 0.0029(8)  | 0.0022(8)  |
| N3   | 0.0059(10)  | 0.0042(9)   | 0.0048(9)   | -0.0002(7)  | 0.0018(7)  | -0.0009(8) |
| N4   | 0.0111(11)  | 0.0037(7)   | 0.0032(8)   | 0.0004(8)   | 0.0009(7)  | -0.0020(9) |
| N5   | 0.0079(10)  | 0.0062(12)  | 0.0105(11)  | -0.0010(8)  | 0.0028(9)  | -0.0012(8) |
| N6   | 0.0049(9)   | 0.0057(9)   | 0.0049(9)   | 0.0006(7)   | 0.0012(7)  | -0.0013(7) |
| N7   | 0.0038(9)   | 0.0081(9)   | 0.0074(9)   | 0.0013(8)   | 0.0020(7)  | -0.0001(7) |
| N8   | 0.0045(9)   | 0.0092(10)  | 0.0061(9)   | 0.0002(7)   | 0.0009(7)  | 0.0003(7)  |
| N9   | 0.0052(8)   | 0.0081(9)   | 0.0055(8)   | -0.0018(7)  | 0.0008(7)  | 0.0012(7)  |
| N10  | 0.0067(9)   | 0.0048(9)   | 0.0044(8)   | 0.0000(7)   | 0.0010(7)  | 0.0025(7)  |
| O1   | 0.0099(11)  | 0.0055(12)  | 0.0129(11)  | -0.0005(9)  | 0.0068(9)  | 0.0024(9)  |
| O2   | 0.0068(10)  | 0.0042(9)   | 0.0053(9)   | 0.0015(8)   | 0.0029(8)  | 0.0022(8)  |
| O3   | 0.0059(10)  | 0.0042(9)   | 0.0048(9)   | -0.0002(7)  | 0.0018(7)  | -0.0009(8) |
| O4   | 0.0111(11)  | 0.0037(7)   | 0.0032(8)   | 0.0004(8)   | 0.0009(7)  | -0.0020(9) |
| O5   | 0.0079(10)  | 0.0062(12)  | 0.0105(11)  | -0.0010(8)  | 0.0028(9)  | -0.0012(8) |
| O6   | 0.0049(9)   | 0.0057(9)   | 0.0049(9)   | 0.0006(7)   | 0.0012(7)  | -0.0013(7) |
| O7   | 0.0038(9)   | 0.0081(9)   | 0.0074(9)   | 0.0013(8)   | 0.0020(7)  | -0.0001(7) |
| O8   | 0.0045(9)   | 0.0092(10)  | 0.0061(9)   | 0.0002(7)   | 0.0009(7)  | 0.0003(7)  |
| O9   | 0.0052(8)   | 0.0081(9)   | 0.0055(8)   | -0.0018(7)  | 0.0008(7)  | 0.0012(7)  |
| O10  | 0.0067(9)   | 0.0048(9)   | 0.0044(8)   | 0.0000(7)   | 0.0010(7)  | 0.0025(7)  |

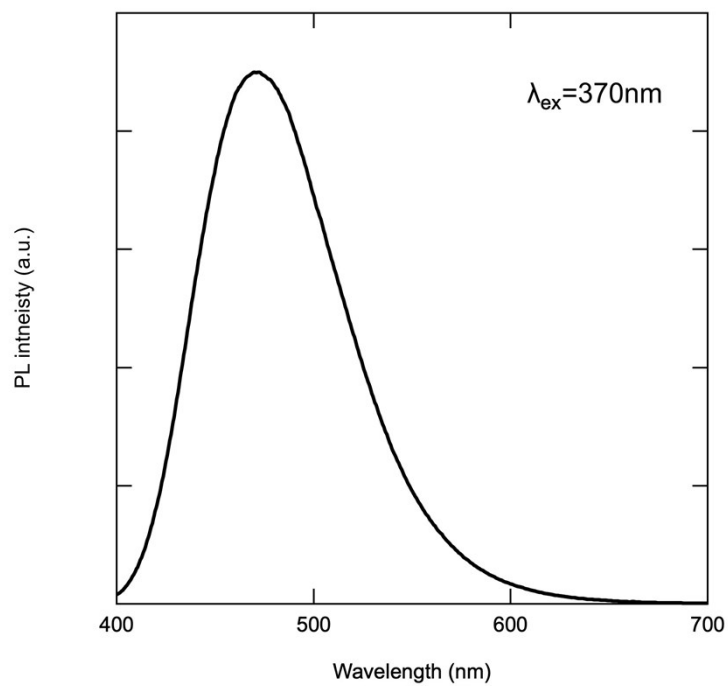

**Figure S1 Emission spectrum of  $\text{Ba}_{0.81}\text{Eu}_{0.19}(\text{Si}_{6.66}\text{Al}_{0.34})(\text{N}_{9.66}\text{O}_{0.34})_{10}$  particle synthesized without  $\text{Li}_3\text{N}$ .**
